# Supplementary material for: Custom designed ZnMn2O4/nitrogen doped graphene composite anode validated for sodium ion battery application
Source: Royal Society of Chemistry journal article supplement (doi:10.1039/c7ra02289a), 2017-01-01
Supplement: c7ra02289a1.pdf [file c7ra02289a1.pdf]

## Supporting Information

### **Custom Designed $\text{ZnMn}_2\text{O}_4$ /Nitrogen Doped Graphene Composite Anode Validated for Sodium ion Battery Application**

*Bongu Chandra Sekhar, Packiyalakshmi Parameswaran and Nallathamby Kalaiselvi\**

CSIR-Central Electrochemical Research Institute, Karaikudi-630 006, Tamilnadu, India.

\*Corresponding Author. Tel.: +91 4565 241427.

E-mail: kalaiselvicecri@gmail.com

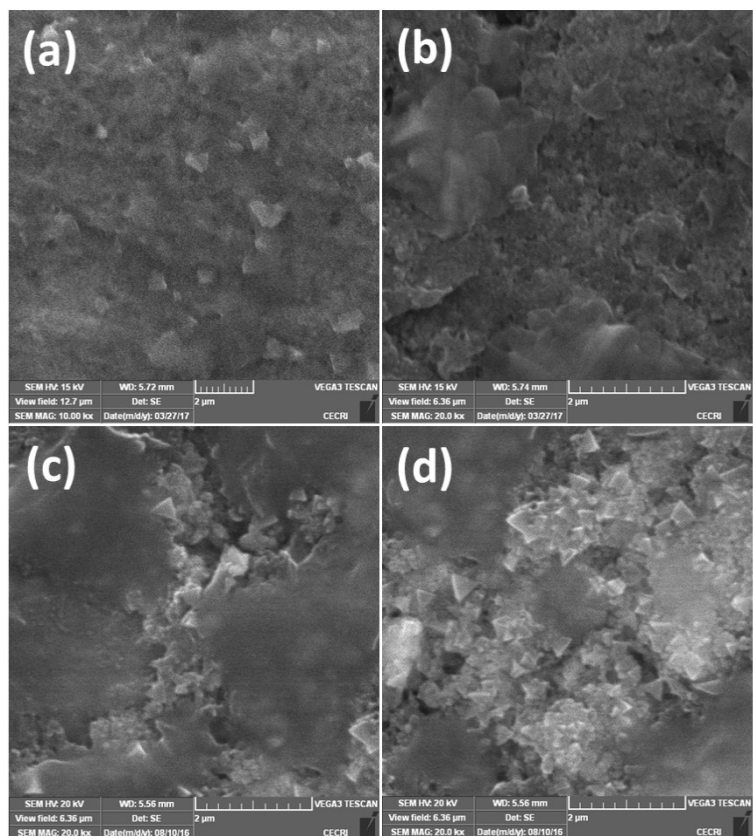

**Figure S1.** Post cycling SEM images of (a-b) ZMO after 150 cycles and (c-d) ZMO/NG nanocomposite electrode after 1000 charge/discharge cycles at a current density of  $100 \text{ mA g}^{-1}$ .

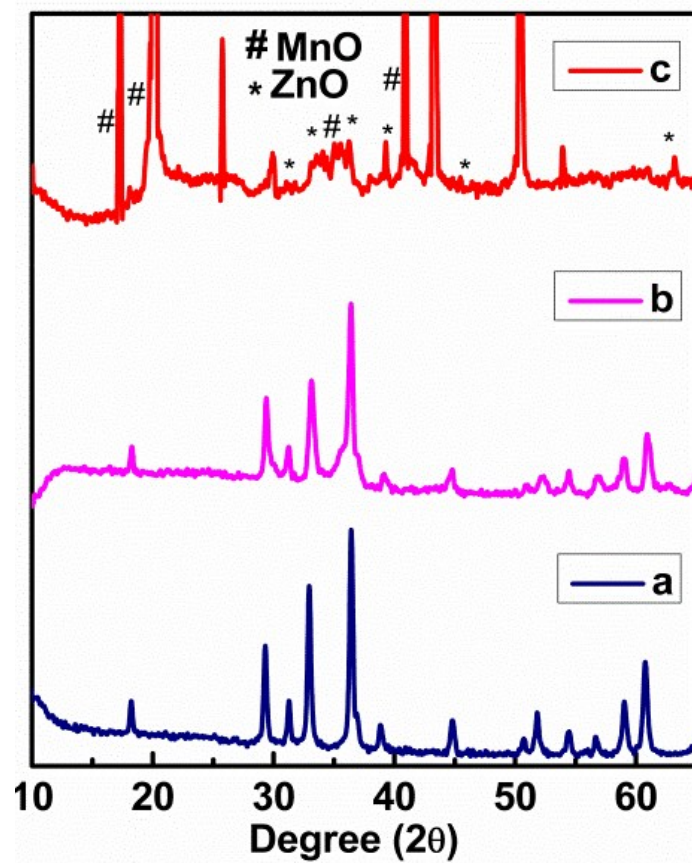

**Figure S2.** XRD pattern of (a) pristine ZMO, (b) ZMO/NG nanocomposite electrode and (c) ZMO/NG nanocomposite electrode after 1000 charge/discharge cycles at a current density of 100 mA g<sup>-1</sup>.

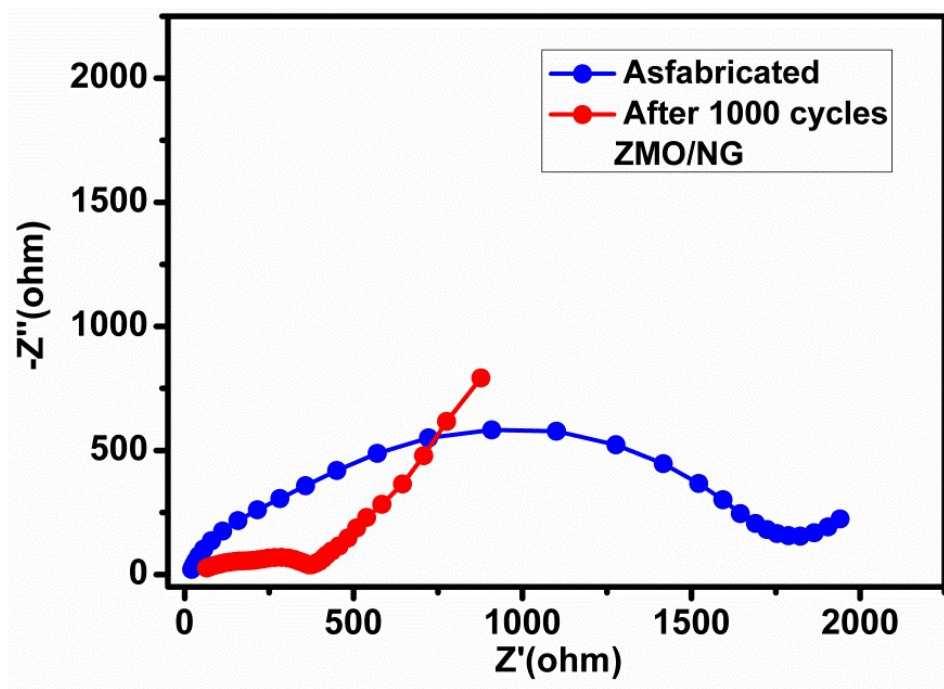

**Figure S3.** Electrochemical impedance spectroscopy of the cell containing ZMO/NG nanocomposite anode recorded for conditions namely as fabricated cell and the cell after completing 1000 cycles
